# Supplementary material
Source: PubMed Central journal article supplement (PMC2639320)

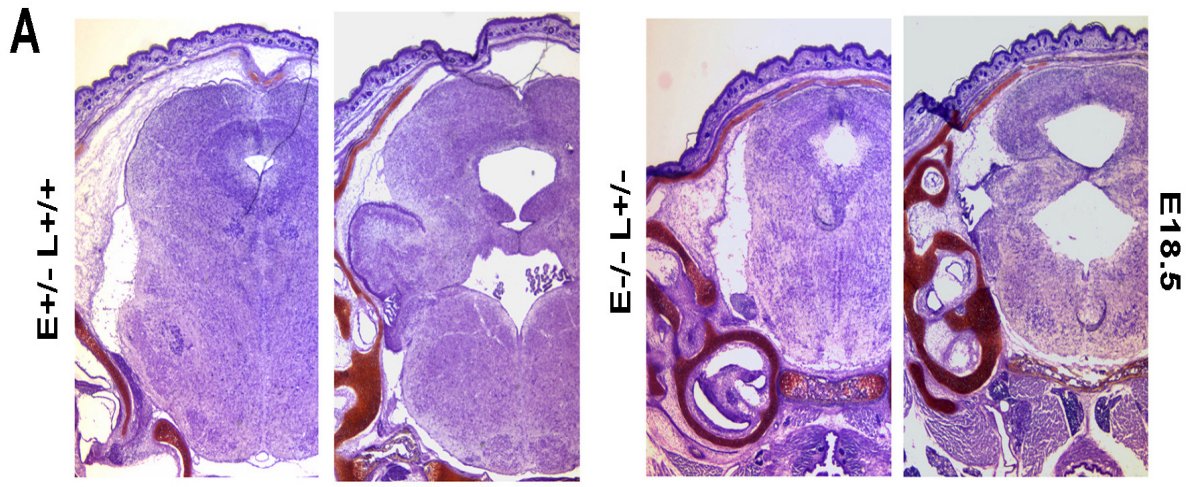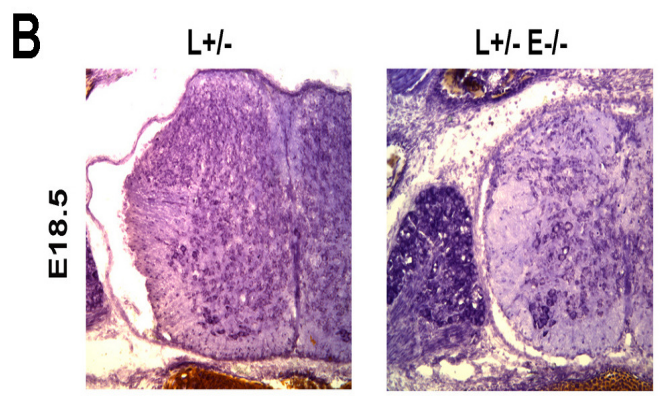

**A**

E11.5

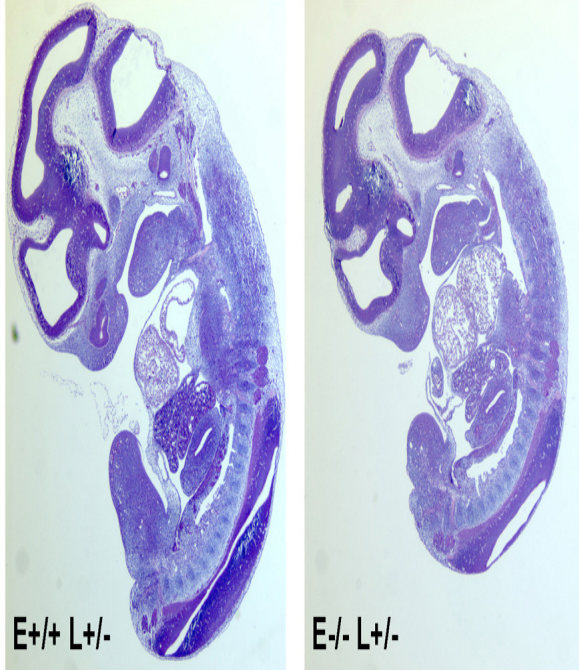

**B**

E11.5

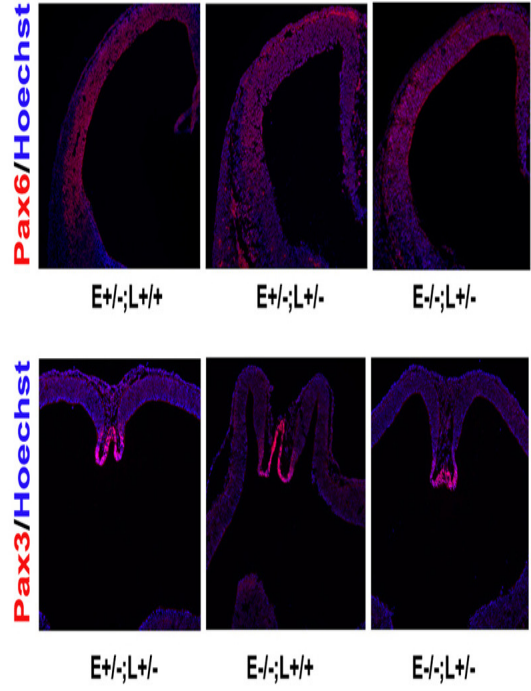

BrdU / PH3 / DNA

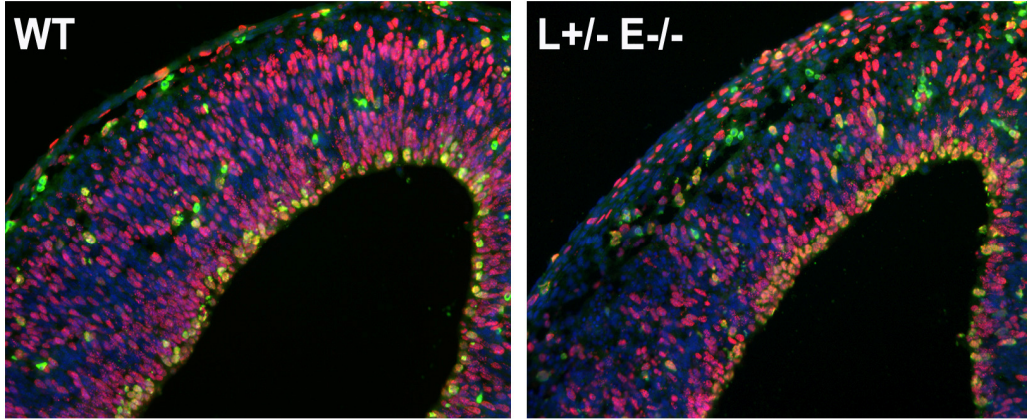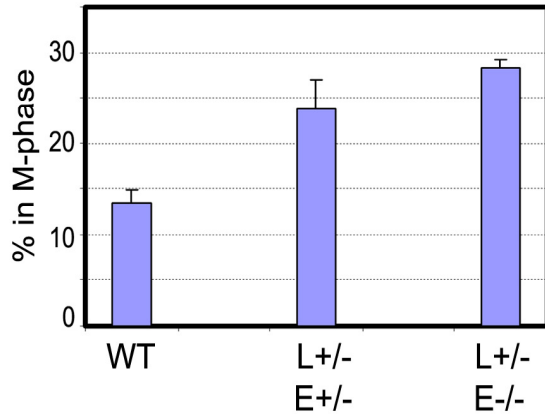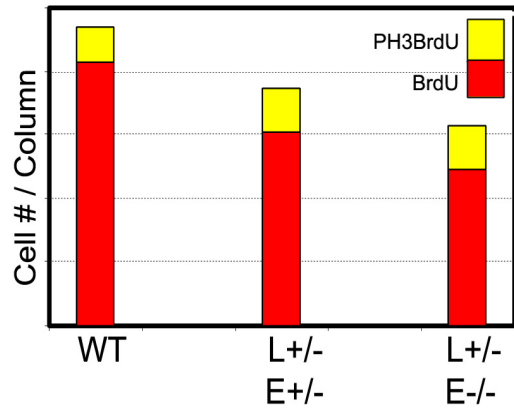

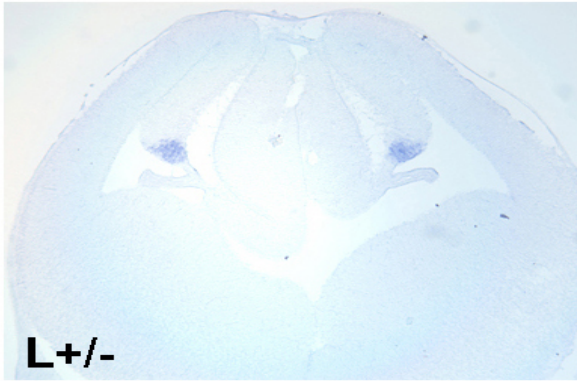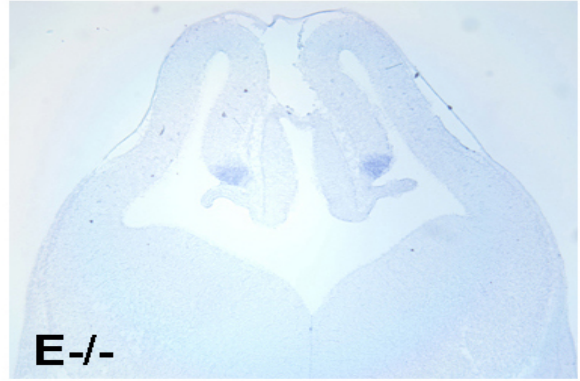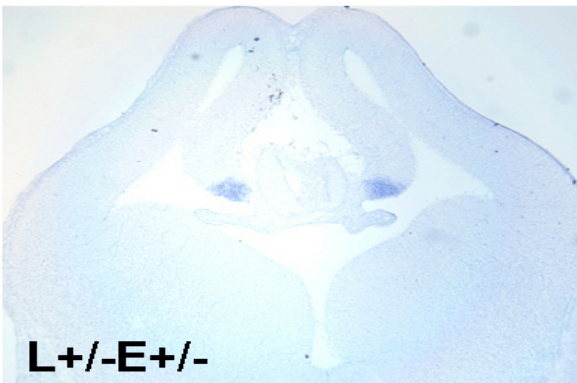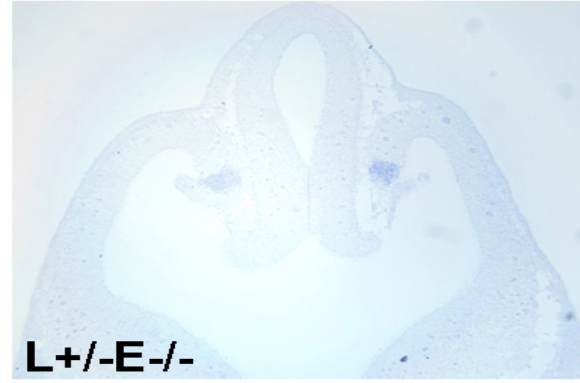

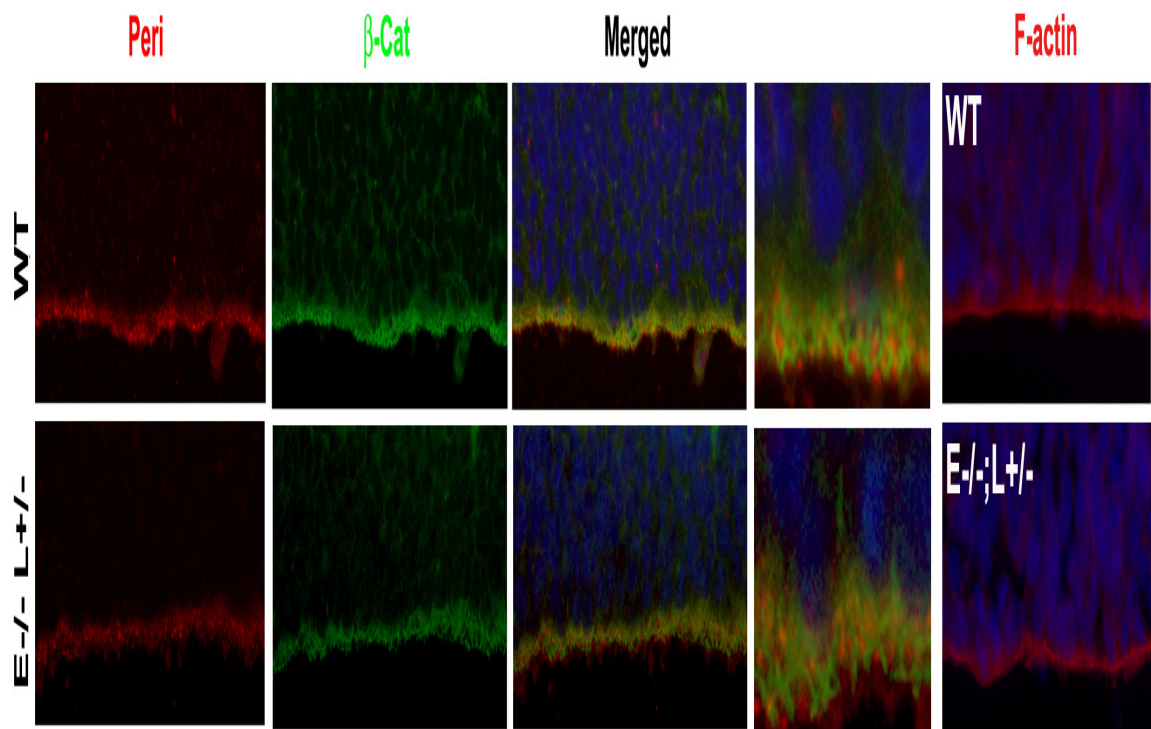

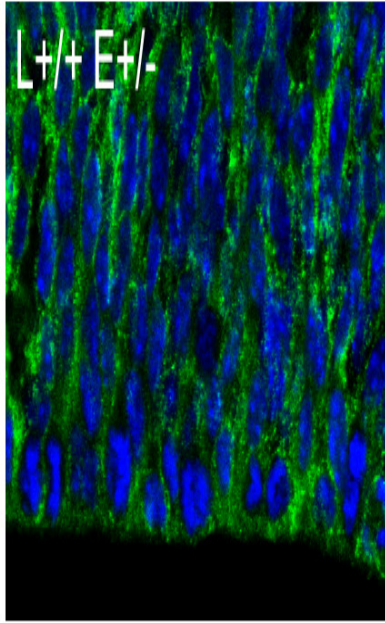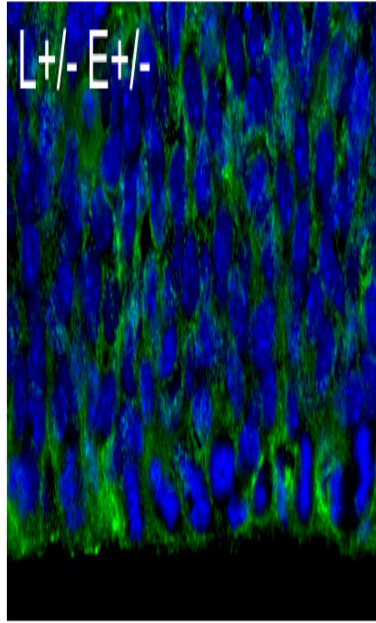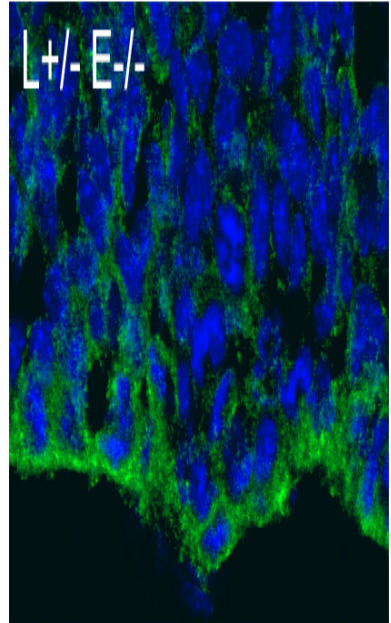

Supplement: ddn144_1.pdf [file ddn144_1.pdf]
